# Supplementary material
Source: publisher figshare collection journal article supplement (https://acs.figshare.com/ndownloader/files/3963547)

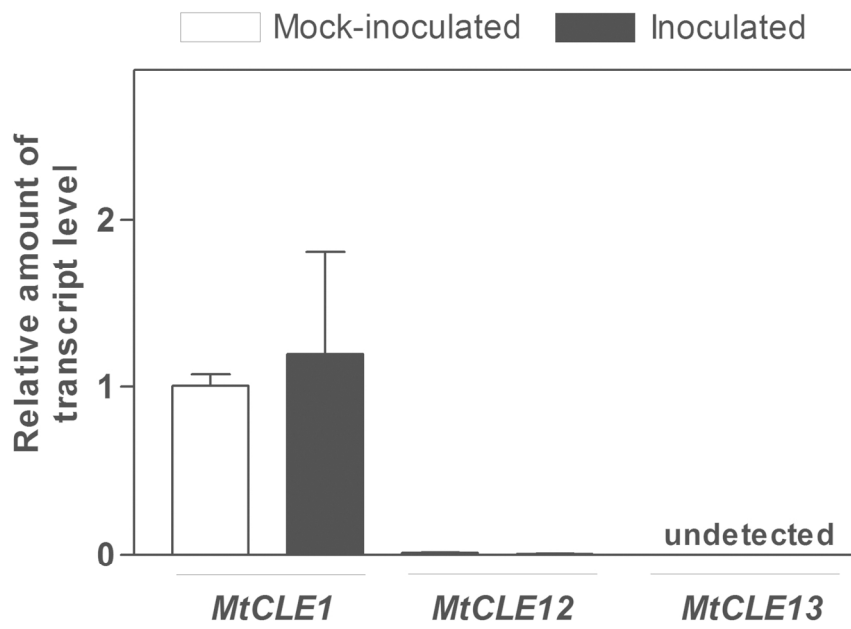

80x55mm (600 x 600 DPI)

Supplement: Supplementary file 1 [file 3963547]
